# Supplementary material
Source: PubMed Central journal article supplement (PMC2570730)
Supplement: tpc.108.058487_1.pdf [file tpc.108.058487_1.pdf]

**Title:** Proteolysis-independent down-regulation of DELLA repression in Arabidopsis by the gibberellin receptor GIBBERELLIN INSENSITIVE DWARF1.

**Authors:** Tohru Ariizumi, Kohji Murase, Tai-ping Sun, and Camille M. Steber

---

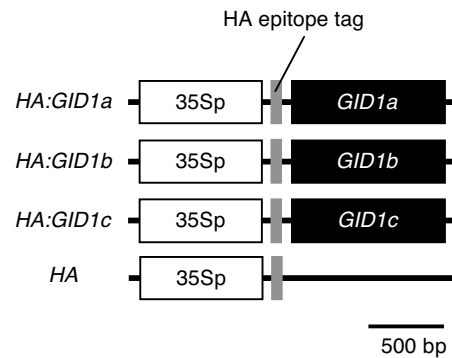

### Supplemental Figure 1.

Schematic diagram of the chimeric HA:GID1 constructs. The Arabidopsis *GID1a*, *GID1b* and *GID1c* genes were overexpressed under control of the constitutive 35S CaMV promoter. The HA epitope tag was fused in-frame with the *GID1* coding region at the N terminal position to allow determination of GID1 protein expression levels. A construct in which only the HA epitope tag is overexpressed was created as a control. These constructs are named as *HA:GID1a*, *HA:GID1b*, *HA:GID1c* and *HA*.

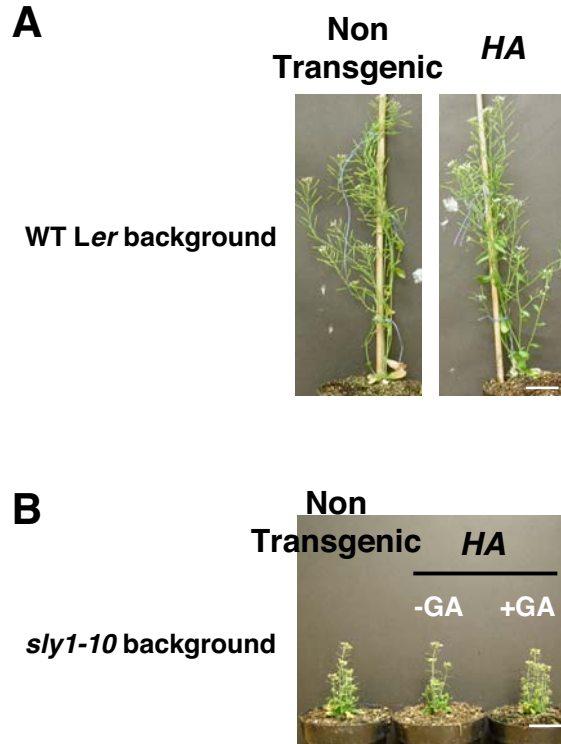

**Supplemental Figure 2.**

The *HA* control construct had no effect on growth and development. A construct overexpressing only the HA epitope tag was introduced into WT (**A**) and the *sly1-10* (**B**) mutant backgrounds. No effect on growth or fertility was observed after 36-d of growth. Transgenic plants were treated with and without 10  $\mu$ M GA<sub>4</sub> every 3 d. Bar = 5 cm.

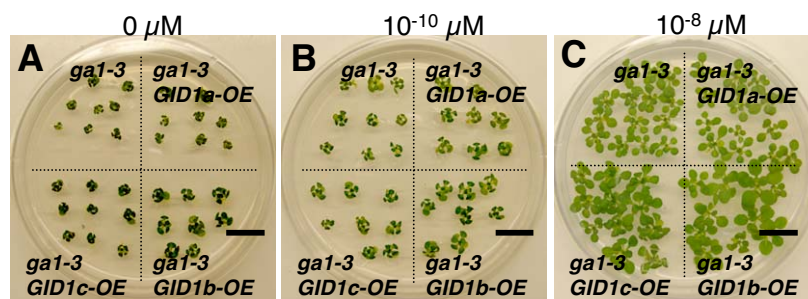

### Supplemental Figure 3.

*ga1-3* plants used for measurements shown in Figure 2 show enhanced GA sensitivity when transformed with *GID1-OE* constructs. The *ga1-3* mutant and the transgenic *ga1-3* mutant plants in which each *GID1* gene was overexpressed (*GID1a-OE*, *GID1b-OE* and *GID1c-OE* lines) were grown on MS-agar containing different concentrations of GA (0, 10<sup>-10</sup>, and 10<sup>-8</sup> M) at 22°C for 10 d. Seeds were incubated in an aqueous 10<sup>-5</sup> M GA<sub>4</sub> solution at 4°C for 3 d to stimulate seed germination (See Methods). (A) 0 μM, (B) 10<sup>-10</sup> μM, (C) 10<sup>-8</sup> μM. Bar = 1 cm.

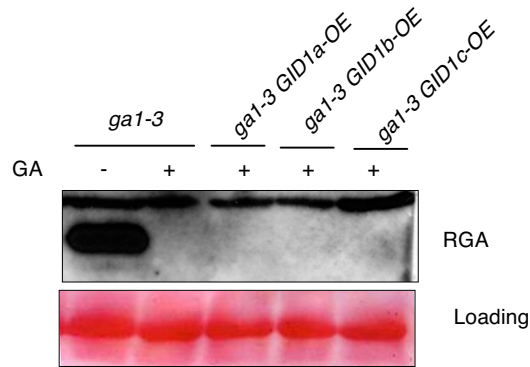

**Supplemental Figure 4.**

RGA protein accumulation after GA treatment in *gal-3 GID1-OE* plants. After 10-d-old *gal-3* and *gal-3 GID1-OE* plants were treated with 100  $\mu$ M GA<sub>3</sub> for 3 h, total protein was extracted and 40  $\mu$ g was analyzed by immunoblot. Protein from the 10-d-old *gal-3* seedling without GA treatment was also loaded. Equal loading was confirmed by ponceau staining. Bar = 1 cm.

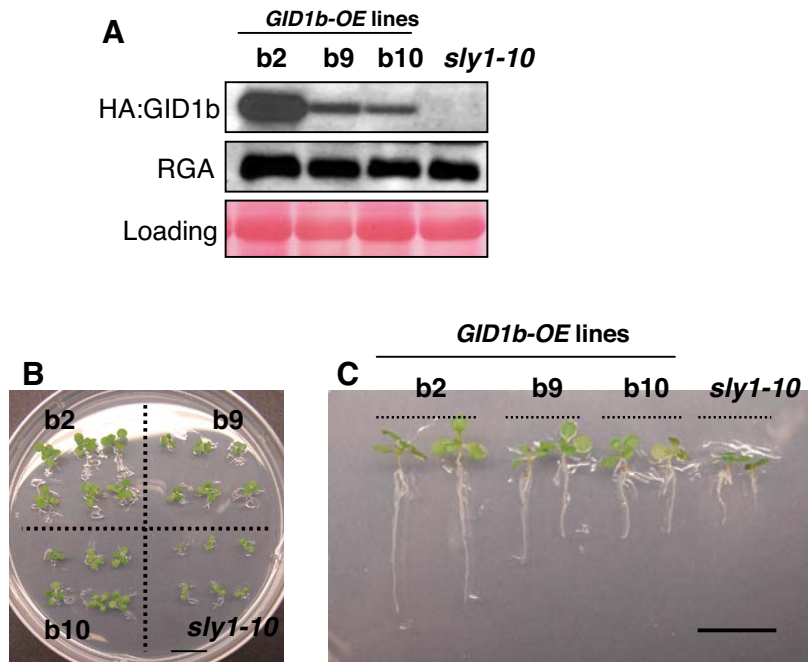

**Supplemental Figure 5.**

HA:GID1b levels correlate with *sly1-10* seedling growth. (A) Protein blot analysis to detect HA:GID1b and RGA protein accumulation from 14-d-old seedling of *sly1-10* and independent *sly1-10* *GID1b-OE* lines (b2, b9 and b10). 40  $\mu$ g of total protein was loaded. 14-d-old seedling appearance (B) and root development (C) in *sly1-10* and independent *sly1-10* *GID1b-OE* lines. Bar = 1 cm.

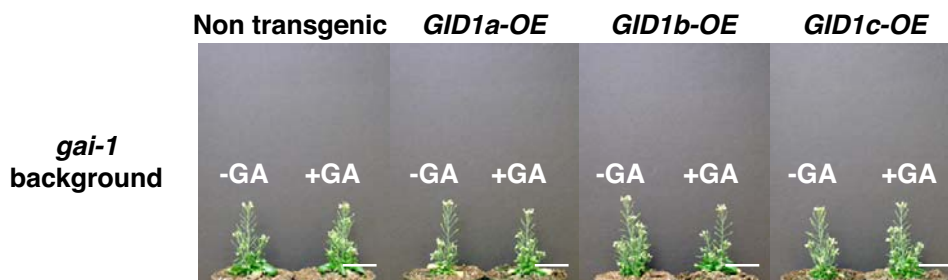

**Supplemental Figure 6.**

HA:GID1 constructs did not suppress growth defects of the *gai-1* mutant. *HA:GID1a*, *HA:GID1b* and *HA:GID1c* constructs were introduced into *gai-1* mutant background. Growth of 36-d-old plants were compared with and without GA treatment. Bar = 5 cm.

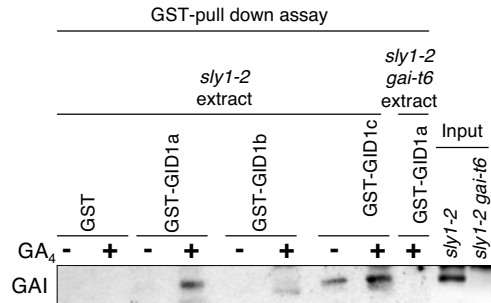

### Supplemental Figure 7

GST-GID1 pull down assay shows interaction with DELLA GAI protein. GST pull-down assays of GAI protein using GST-GID1a, GST-GID1b, and GST-GID1c were performed according to Griffiths et al., (2006) with the following modifications. Five gram of 11d-old seedlings of *sly1-2* and *sly1-2 gai-t6* were harvested, ground in liquid nitrogen, and suspended in 3 ml buffer B. The extracted protein was centrifuged, and the supernatant was transferred to new tubes. The 2 mg of total protein extract from the *sly1-2* and/or *sly1-2 gai-t6* was mixed with 80  $\mu$ l of beads from recombinant GST-GID1 proteins, and with 25  $\mu$ l beads from control GST protein. The mixture was agitated for 2 h at 4°C in the absence (-) and presence (+) of 100  $\mu$ M GA<sub>4</sub>. The beads were washed five times with buffer A, and resuspended with 10  $\mu$ l of 6x SDS sample buffer. 15  $\mu$ l of beads for each sample were loaded for protein blot analysis. GAI protein was detected using affinity purified SLR1 antibody (1:10,000; Itoh et al., 2002). Incubation with secondary antibody and detection of signals were performed as described in Materials and Methods.

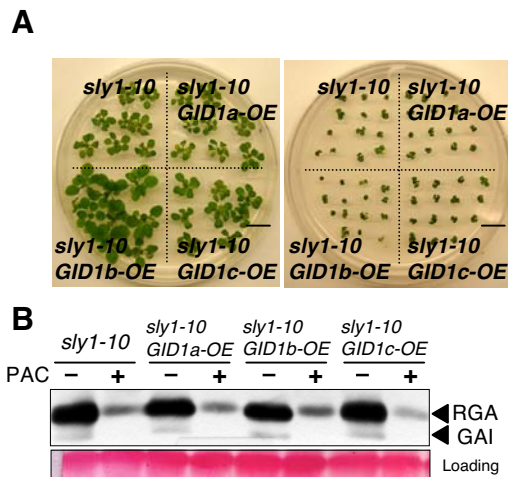

**Supplemental Figure 8.**

The GA biosynthesis inhibitor PAC blocks rescue of *sly1-10* by *GID1* overexpression. **(A)** 10 d-old *sly1-10* and the *sly1-10* *GID1-OE* plants were transferred to MS-agar with and without 1  $\mu$ M PAC treatment and incubated for 12 d at 22°C. Bar = 1 cm. **(B)** The effect of PAC treatment on the RGA and GAI protein accumulation was determined by protein blot analysis using RGA antibody. 40  $\mu$ g of total protein from **(A)** was loaded, and equal loading confirmed by ponceau staining.



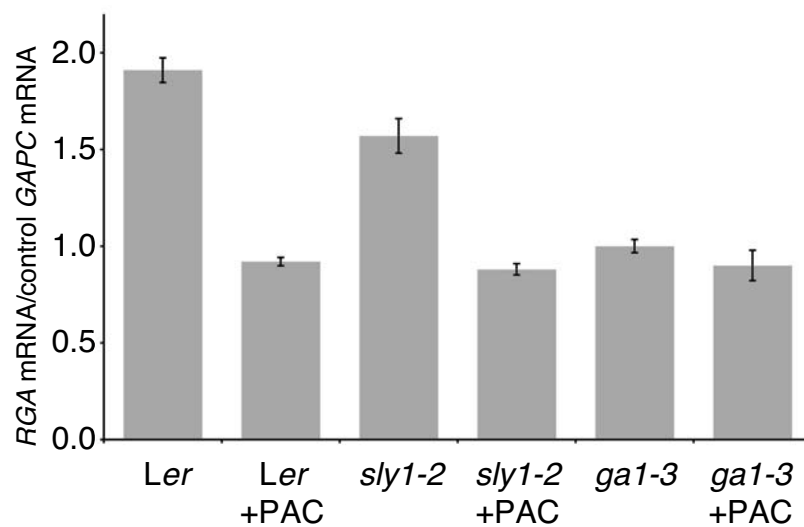

### Supplemental Figure 9

*RGA* mRNA accumulation in WT *Ler*, *sly1-2* and *ga1-3* mutants in the absence and presence of PAC treatment. 10d-old seedlings of *Ler*, *sly1-2* and *ga1-3* plants were moved to the fresh MS media with and without PAC application. After 12-d incubation at 22°C, total mRNA was extracted, cDNA was synthesized and qRT-PCR analysis was performed as described in Materials and Methods. Mean values for at least three independent experiments are shown. Error bars show standard deviation.

Supplemental Table 1

Table S1a Final plant height (cm) in the *slv1-10* background.

| NT    |       | HA    |       | GID1a-OE (a6)      |                    | GID1a-OE (a7)      |                    | GID1b-OE (b2)      |                    | GID1b-OE (b3)      |                    | GID1c-OE (c3)      |       |
|-------|-------|-------|-------|--------------------|--------------------|--------------------|--------------------|--------------------|--------------------|--------------------|--------------------|--------------------|-------|
| -GA   | +GA   | -GA   | +GA   | -GA                | +GA                | -GA                | +GA                | -GA                | +GA                | -GA                | +GA                | -GA                | +GA   |
| 17.7  | 17.6  | 18.1  | 17.6  | 20.2               | 20.0               | 21.5               | 21.4               | 31.8               | 31.7               | 30.4               | 30.8               | 22.0               | 21.7  |
| ± 0.4 | ± 0.9 | ± 0.6 | ± 0.9 | ± 0.6 <sup>a</sup> | ± 0.8 <sup>a</sup> | ± 0.8 <sup>b</sup> | ± 0.7 <sup>b</sup> | ± 1.1 <sup>b</sup> | ± 1.4 <sup>b</sup> | ± 1.2 <sup>b</sup> | ± 1.2 <sup>b</sup> | ± 0.3 <sup>b</sup> | ± 0.7 |

Table S1b Final plant height (cm), in the *slv1-2* mutant background.

| NT         |            | GID1a-OE (a3)           |                         | GID1b-OE (b6)           |                         | GID1b-OE (b8)           |                         | GID1c-OE (c4)           |                         |
|------------|------------|-------------------------|-------------------------|-------------------------|-------------------------|-------------------------|-------------------------|-------------------------|-------------------------|
| -GA        | +GA        | -GA                     | +GA                     | -GA                     | +GA                     | -GA                     | +GA                     | -GA                     | +GA                     |
| 11.3 ± 0.5 | 10.9 ± 0.6 | 20.5 ± 0.5 <sup>b</sup> | 20.2 ± 1.0 <sup>b</sup> | 31.1 ± 0.5 <sup>b</sup> | 31.7 ± 0.9 <sup>b</sup> | 30.7 ± 1.5 <sup>b</sup> | 30.3 ± 0.6 <sup>b</sup> | 22.4 ± 0.7 <sup>b</sup> | 22.2 ± 0.5 <sup>b</sup> |

Table S1c Final plant height (cm), in the WT *Ler*.

| NT         |            | HA         |            | GID1a-OE (a6)           |                         | GID1b-OE (b1)           |                         | GID1c-OE (c7)           |                         |
|------------|------------|------------|------------|-------------------------|-------------------------|-------------------------|-------------------------|-------------------------|-------------------------|
| -GA        | +GA        | -GA        | +GA        | -GA                     | +GA                     | -GA                     | +GA                     | -GA                     | +GA                     |
| 28.4 ± 0.7 | 31.5 ± 0.6 | 28.2 ± 0.8 | 31.0 ± 0.4 | 32.2 ± 0.3 <sup>b</sup> | 33.1 ± 0.4 <sup>a</sup> | 38.3 ± 0.5 <sup>b</sup> | 41.6 ± 0.6 <sup>b</sup> | 34.5 ± 0.4 <sup>b</sup> | 35.9 ± 0.2 <sup>b</sup> |

Table S1d Final height (cm), in the *gal-3* background.

| NT   |            | GID1a-OE (a7) |                         | GID1b-OE (b2) |                         | GID1c-OE (c7) |                         |
|------|------------|---------------|-------------------------|---------------|-------------------------|---------------|-------------------------|
| -GA  | +GA        | -GA           | +GA                     | -GA           | +GA                     | -GA           | +GA                     |
| N.D. | 17.7 ± 0.9 | N.D.          | 20.2 ± 0.4 <sup>a</sup> | N.D.          | 26.7 ± 0.5 <sup>b</sup> | N.D.          | 23.0 ± 0.4 <sup>b</sup> |

Supplemental Table 1

Table S1e Final plant height (cm), in the *rga-Δ17* background.

| NT         |            | GID1a-OE (a6) |            | GID1b-OE (b2) |            | GID1c-OE (c7) |            |
|------------|------------|---------------|------------|---------------|------------|---------------|------------|
| -GA        | +GA        | -GA           | +GA        | -GA           | +GA        | -GA           | +GA        |
| 10.5 ± 0.3 | 10.4 ± 0.4 | 10.1 ± 0.3    | 10.2 ± 0.4 | 10.6 ± 0.6    | 10.8 ± 0.7 | 10.6 ± 0.6    | 10.5 ± 0.9 |

Table S1f Final plant height (cm), in the *gail-1* background.

| NT         |            | GID1a-OE (a1) |            | GID1b-OE (b1) |            | GID1c-OE (c1) |            |
|------------|------------|---------------|------------|---------------|------------|---------------|------------|
| -GA        | +GA        | -GA           | +GA        | -GA           | +GA        | -GA           | +GA        |
| 13.0 ± 0.5 | 13.6 ± 0.2 | 13.5 ± 0.6    | 12.7 ± 0.7 | 13.7 ± 0.6    | 13.0 ± 0.4 | 13.3 ± 0.6    | 13.0 ± 0.4 |

NT, not transformanted

HA, transformants with construct HA (Supplemental Figure 1).

GID1a-OE, transformants with construct HA:GID1a.

GID1b-OE, transformants with construct HA:GID1b.

GID1c-OE, transformants with construct HA:GID1c.

Independently transformed lines indicated in ().

A significant difference from untransformed plants is indicated as a, P < 0.05 or b, P < 0.01 as determined by *t* test.

Supplemental Table 2

Table S2a Fertility, number of seeds/silique in the *sly1-10* background.

| NT            |               | HA            |               | GID1a-OE (a7)              |                            | GID1b-OE (b3)              |                            | GID1c-OE (c3)              |                            |
|---------------|---------------|---------------|---------------|----------------------------|----------------------------|----------------------------|----------------------------|----------------------------|----------------------------|
| -GA           | +GA           | -GA           | +GA           | -GA                        | +GA                        | -GA                        | +GA                        | -GA                        | +GA                        |
| 18.0 ±<br>2.8 | 18.8 ±<br>2.1 | 17.4 ±<br>2.1 | 18.2 ±<br>2.4 | 45.2 ±<br>3.8 <sup>b</sup> | 45.1 ±<br>2.6 <sup>b</sup> | 41.6 ±<br>2.1 <sup>b</sup> | 38.7 ±<br>4.4 <sup>b</sup> | 61.5 ±<br>3.5 <sup>b</sup> | 61.6 ±<br>7.6 <sup>b</sup> |

Table S2b Fertility, number of seeds/silique in the *sly1-2* background.

| NT            |               | GID1a-OE (a3)              |                            | GID1b-OE (b8)              |                            | GID1c-OE (c4)              |                            |
|---------------|---------------|----------------------------|----------------------------|----------------------------|----------------------------|----------------------------|----------------------------|
| -GA           | +GA           | -GA                        | +GA                        | -GA                        | +GA                        | -GA                        | +GA                        |
| 12.1 ±<br>2.0 | 10.6 ±<br>1.9 | 48.7 ±<br>3.3 <sup>b</sup> | 47.6 ±<br>3.2 <sup>b</sup> | 40.6 ±<br>3.1 <sup>b</sup> | 42.9 ±<br>1.9 <sup>b</sup> | 63.5 ±<br>3.5 <sup>b</sup> | 64.8 ±<br>1.6 <sup>b</sup> |

Table S2c Fertility, number of seeds/silique in WT Ler.

| NT            |               | HA            |               | GID1a-OE (a6) |               | GID1b-OE (b1) |               | GID1c-OE (c7) |               |
|---------------|---------------|---------------|---------------|---------------|---------------|---------------|---------------|---------------|---------------|
| -GA           | +GA           |
| 71.3 ±<br>2.2 | 71.7 ±<br>2.8 | 71.0 ±<br>3.0 | 72.0 ±<br>2.9 | 71.2 ±<br>2.0 | 72.2 ±<br>1.6 | 72.7 ±<br>2.8 | 70.3 ±<br>2.1 | 74.3 ±<br>6.3 | 73.7 ±<br>2.9 |

Table S2d Fertility, number of seeds/silique in the *gal-3* background.

| NT   |               | GID1a-OE (a7) |               | GID1b-OE (b2) |               | GID1c-OE (c7) |               |
|------|---------------|---------------|---------------|---------------|---------------|---------------|---------------|
| -GA  | +GA           | -GA           | +GA           | -GA           | +GA           | -GA           | +GA           |
| N.D. | 25.8 ±<br>2.8 | N.D.          | 26.4 ±<br>3.0 | N.D.          | 27.4 ±<br>3.0 | N.D.          | 27.6 ±<br>4.8 |

Table S2e Fertility, seeds/silique in the *rga-Δ17* background.

| NT            |               | GID1a-OE (a6) |               | GID1b-OE (b2) |               | GID1c-OE (c7) |               |
|---------------|---------------|---------------|---------------|---------------|---------------|---------------|---------------|
| -GA           | +GA           | -GA           | +GA           | -GA           | +GA           | -GA           | +GA           |
| 64.3 ±<br>1.9 | 66.0 ±<br>2.5 | 62.0 ±<br>3.9 | 61.2 ±<br>4.6 | 60.4 ±<br>6.0 | 69.3 ±<br>5.4 | 64.0 ±<br>2.6 | 66.0 ±<br>2.5 |

Table S2f Fertility, seeds/silique in the *gai1-1* background.

| NT            |               | GID1a-OE (a1) |               | GID1b-OE (b1) |               | GID1c-OE (c1) |               |
|---------------|---------------|---------------|---------------|---------------|---------------|---------------|---------------|
| -GA           | +GA           | -GA           | +GA           | -GA           | +GA           | -GA           | +GA           |
| 50.0 ±<br>4.6 | 48.4 ±<br>3.9 | 49.9 ±<br>3.4 | 52.8 ±<br>7.4 | 47.8 ±<br>5.9 | 54.1 ±<br>5.1 | 53.1 ±<br>5.0 | 51.8 ±<br>3.7 |

NT, Not transformed plants

HA, transformants with HA vector (Supplemental Figure 1).

GID1a-OE, transformed with construct 35S:HA::GID1a.

GID1b-OE, transformed with construct 35S:HA::GID1b.

GID1c-OE, transformed with construct 35S:HA::GID1c.

Independently transformed lines indicated in ().

A significant difference from untransformed plants is indicated as a, P < 0.05 or b, P < 0.01 as determined by *t* test.

Supplementary Table 3. Primer sequences used for this study.

| Amplified PCR fragment | Primer-F              | Primer-R                     | Purpose                               |
|------------------------|-----------------------|------------------------------|---------------------------------------|
| GID1a                  | ATGGCTGCGAGCGATGAAGT  | TTAACATTCCGCGTTTACAAACGCCGAA | Construction of overexpression vector |
| GID1b                  | ATGGCTGGTGGTAACGAAGT  | CTAAGGAGTAAGAAGCACAG         | Construction of overexpression vector |
| GID1c                  | ATGGCTGGAAGTGAGAAAGT  | TCATTGGCATTCTGCGTTTACAAAT    | Construction of overexpression vector |
| Hemagglutinin (HA)     | ATGGCAGGTTACCCATACGAC | CATATGGTGGACGCCTCTAGA        | Construction of overexpression vector |
| RGA                    | AGAAGCAATCCAGCAGA     | GTGTA CTCTCTTACCTTC          | Quantitative RT-PCR                   |
| GAPC                   | AGCTGCTACCTACGATG     | CACACGGGAACGTAAAC            | Quantitative RT-PCR                   |
